# Supplementary material for: Stable isotope analyses of web-spinning spider assemblages along a headwater stream in Puerto Rico
Source: PeerJ. 2015 Oct 15;3:e1324. doi: 10.7717/peerj.1324 (PMC4614906; doi:10.7717/peerj.1324)
Supplement: Supplemental Information 1 [file peerj-03-1324-s001.xlsx]

## Sheet: Metadata
Corresponding Author Contact information:
Sean P. Kelly
Department of Biology, University of Puerto Rico-Rio Piedras
San Juan, Puerto Rico 00936-8377
spkelly.84@gmail.com
Date and Location of the Research:
This data was collected during April through August of 2012 along the stream Quebrada Prieta within the El Yunque National Forest of northeastern Puerto Rico (18˚18’N and longitude 65˚47’W)
Description of spider abundance data:
Column headings are taxa of web spinning spiders collected. With the numer of individuals collected during both Diurnal and Nocturnal sampling in Riverine (within the stream channel) and Riparian (10m from the stream channel) quadrats (3x3x2.5m).
Description of stable isotope data:
Column headings are (from left to right): Sample Description which describes the type of sample analyzed for δ15N and δ13C. The following three column headings (Order, Family and Genus) give the sceintific classification of the invertebrates analyzed for δ15N and δ13C. The last two columns give the values for δ15N and δ13C which are calculated as δ13C or δ15N = [(Rsample/Rstandard) – 1] x 1000 wh…

## Sheet: Spider Abundance Data
	Araneidae	Chrysometa sp.	Leucauge sp.	Modisimus sp.	Tetragnatha sp.	Wendilgarda sp.	Theridiosoma sp.	Miagrammopes sp.
Diurnal_Riparian	0	0	24	2	0	1	0	1
Diurnal_Riparian	0	0	8	0	0	1	5	0
Diurnal_Riparian	0	0	2	0	0	3	4	4
Diurnal_Riparian	0	0	0	2	0	7	6	4
Diurnal_Riverine	0	0	10	4	0	10	0	1
Diurnal_Riverine	0	0	18	1	1	32	0	1
Diurnal_Riverine	0	0	0	0	0	13	1	0
Diurnal_Riverine	0	0	5	5	0	21	2	2
Nocturnal_Riparian	0	0	8	1	0	1	2	2
Nocturnal_Riparian	1	4	4	0	0	2	1	1
Nocturnal_Riparian	0	1	11	1	0	2	3	10
Nocturnal_Riparian	0	2	5	2	0	0	1	3
Nocturnal_Riverine	1	6	11	1	0	14	1	1
Nocturnal_Riverine	0	13	4	3	1	10	0	0
Nocturnal_Riverine	0	0	2	3	2	24	1	1
Nocturnal_Riverine	0	2	0	3	2	31	0	1

## Sheet: Stable Isotope Data
Sample Description	Functional Feeding Group (FFG)	Order	Family	Genus	δ13C	δ15N
Stream Leaf Litter					-25.5	0.8
Forest Vegetation					-34.9	-1.3
Stream Periphyton					-32.4	-0.8
Aquatic Insects	collector-gatherer	Diptera	Chironomidae		-26.63	2.63
	filterer	Diptera	Simuliidae		-27.76	2.62
	scraper	Ephemeroptera	Leptophlebidae		-28.15	2.59
	predator	Odonata	Coenagrionidae		-27.42	4.98
	shredder	Trichoptera	Calamoceratidae		-28.55	0.78
	scraper	Trichoptera	Helicopsychidae		-34.88	1.96
	predator	Trichoptera	Hydrobiosidae		-26.51	5.09
	filterer	Trichoptera	Hydropsychidae		-29.41	3.69
Terrestrial Insects	predator	Coleoptera	Lampyridae		-25.3	6.31
		Diptera			-26.75	4.32
	herbivore	Hemiptera	Cicadoidea		-28.69	-0.55
	predator	Hymenoptera	Evaniidae		-26.82	3.83
	herbivore	Lepidoptera			-27.4	1.94
Riverine Spiders		Aranea	Pholcidae	Modisimus	-26.65	3.4
		Aranea	Tetragnathidae	Chrysometa	-26.72	5.19
		Aranea	Tetragnathidae	Leucauge	-26.66	4.53
		Aranea	Tetragnathidae	Tetragnatha	-27.54	3.87
		Aranea	Theridiosomatidae	Theridiosoma	-27.34	3.84
		Aranea	Theridiosomatidae	Wendilgarda	-27.24	4.24
		Aranea	Uloboridae	Miagrammopes	-27.35	2.9
Riparian Spiders		Aranea	Pholcidae	Modisimus	-28.49	3.44
		Aranea	Tetragnathidae	Chrysometa	-27.4	4.51
		Aranea	Tetragnathidae	Leucauge	-27.25	4.76
		Aranea	Theridiosomatidae	Theridiosoma	-27.74	3.55
		Aranea	Uloboridae	Miagrammopes	-27.24	2.54
Upland Spiders		Aranea	Pholcidae	Modisimus	-27.5	3.8
		Aranea	Tetragnathidae	Chrysometa	-26.9	5
		Aranea	Tetragnathidae	Leucauge	-27.3	3.8
		Aranea	Theridiosomatidae	Theridiosoma	-26.5	1.9
		Aranea	Uloboridae	Miagrammopes	-33.3	0.1
